# Supplementary material
Source: publisher figshare collection journal article supplement (https://gsajournals.figshare.com/ndownloader/files/13633982)
Supplement: Supplementary file 1 [file 13633982]

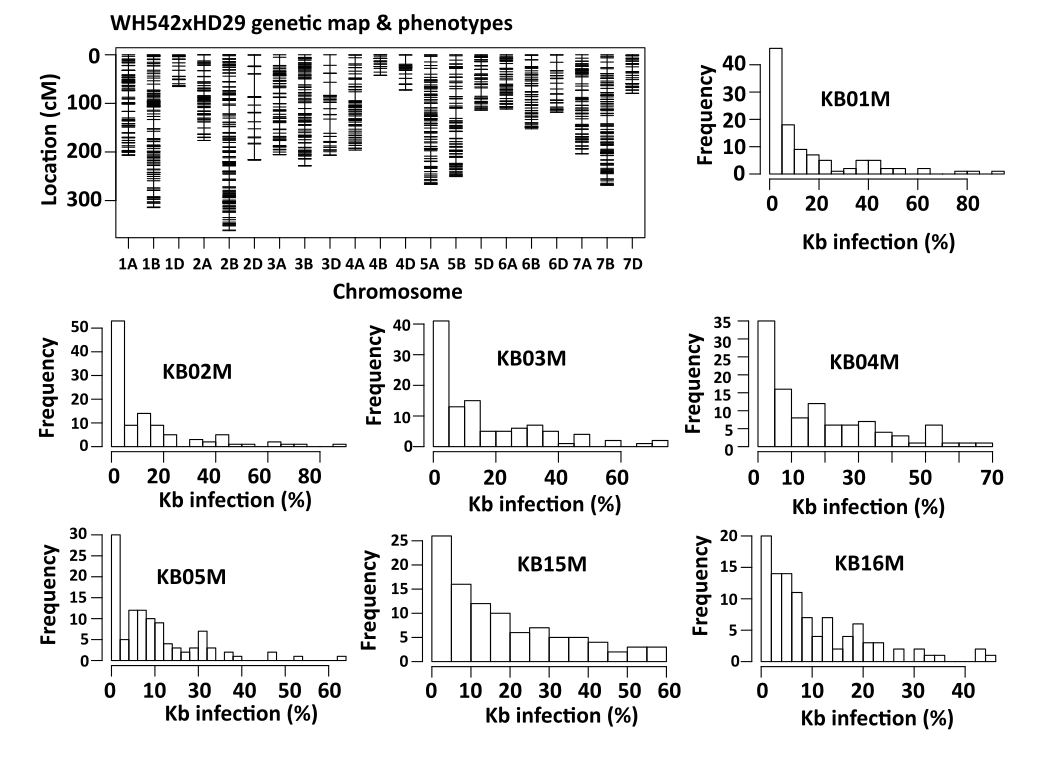


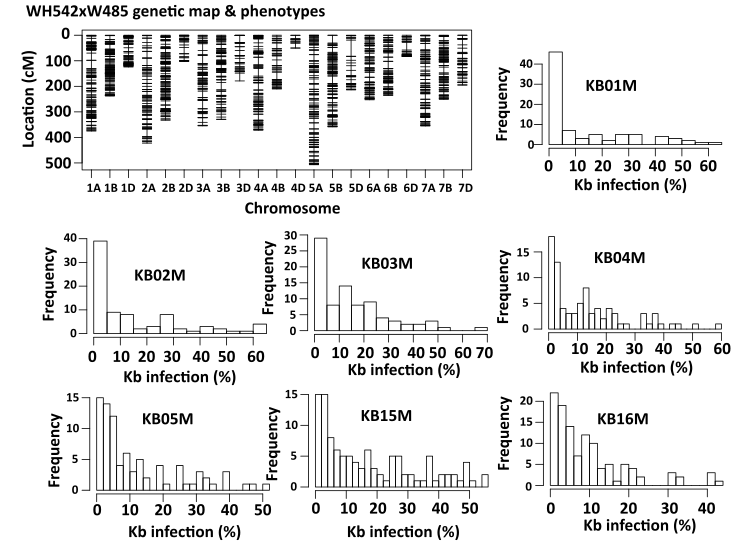


Fig. 1S. Genetic linkage map and phenotypic distribution of percent Karnal bunt infected grains in two wheat recombinant inbred line populations (WH542×HD29 and WH542×W485).
